# Supplementary material for: Synthesized Phosphonium Compounds Demonstrate Resistant Modulatory and Antibiofilm Formation Activities against Some Pathogenic Bacteria
Source: Hindawi journal article supplement (doi:10.1155/2022/7411957), 2022-09-26
Supplement: f1 [file 7411957.f1.docx]

**SUPPORTING INFORMATION**

**Synthesised phosphonium compounds demonstrate resistant modulatory and anti-biofilm formation activities against some pathogenic bacteria.**

**Cedric Dzidzor Kodjo Amengor1*, Cynthia Amaning Danquah2, Emmanuel Bentil Asare Adusei3, Francis Klenam Kekessie3, Francis Ofosu-Koranteng4, Paul Peprah1, Benjamin Kingsley Harley5, Emmanuel Orman1, Joseph Adu3, Yussif Saaka6.**

**Fig SM1**: Synthesis of starting material p-nitrobenzyl azide

Following the general procedure for azide preparation, the reaction of *p*-nitrobenzyl bromide (1 eq., 2.160 g, 10.00 mmol) andNaN3 (3.73 eq., 2.424 g, 37.30 mmol) produced the *title compound* **1a** (1.483 g, 83 %) as a deep yellow oil but turns white solid on storage below room temperature; mp 25 oC. TLC showed no trace of *p*-nitrobenzyl bromide but rather a new spot suspected to be *p*-nitrobenzylazide. After staining the TLC plate with anisaldehyde and heating with a heat gun, the suspected azide spot turned yellow. 1H NMR (500 MHz, CDCl3, room temperature) δ 8.20 (2H, d, *J*= 8.5, C(4)H, C(6)H), 7.50 (2H, d, *J*=8.5 Hz, C(3)H, C(7)H), 4.51 (2H, s, C(1)H2) was consistent with literature data**.**

**Fig SM2**: Synthesis of starting material *p*-nitrobenzyl azide

The benzyl azide (1eq.,) was transferred into a 50 mL flask equipped with magnetic stirrer followed by *tert*butanol and water (2:1, 20 mL) and the suspension stirred for 15 minutes. The alkyne (1.2eq.,), CuSO4.5H2O (0.05eq.,), sodium ascorbate (1eq.,) followed by continuous stirring for another 30 minutes. The pale-yellow solution was heated by reflux at 40 oC for 6 hrs. After 6 hrs, the reaction mixture was concentrated under reduced pressure to remove *tert*butanol. The remaining slurry was diluted with water (20 mL) and transferred into a separatory funnel (250 mL) followed by addition of CH2Cl2 (50 mL). The organic phase (CH2Cl2 portion) was separated, and the aqueous phase washed with CH2Cl2 (2 x 50 mL). The combined organic phases were washed with brine, dried with MgSO4 and the solvent removed under reduced pressure to produce a white solid which was purified by column chromatography to obtain an analytically pure product hereafter called ‘clicked’ compound.

**Fig SM3**: General procedure for the bromination of the ‘clicked’ products.

Into a 100 mL three necked round bottom flask, equipped with a magnetic stirrer, under argon supply, the ‘clicked’ compound was dissolved in anhydrous CH2Cl2 (20 mL). The mixture was cooled to 0 °C and phosphorus tribromide was added dropwise. The mixture was stirred for 30 minutes at 0 °C and allowed to warm to 25 oC. After 2 hrs, a white cloudy reaction mixture was obtained and the reaction was quenched by diluting with distilled water (100 mL), bringing the temperature of the flask to 0 °C. This was followed by dropwise addition of saturated sodium bicarbonate solution until effervescence ceased. The resulting solution was transferred into a 250 mL separatory funnel and the organic phase separated. The organic phase (CH2Cl2 portion) was separated and the aqueous phase washed with CH2Cl2 (3 x 50 mL). The combined organic phase was washed with brine, dried with MgSO4 and the solvent was removed under reduced pressure to obtain a white solid which was purified by column chromatography.

**Fig SM4**: General procedure for the synthesis of the phosphonium salts

Into a round bottom flask under argon equipped with magnetic stirrer, was transferred toluene (30 mL), triphenylphosphine (1.05 eq.,) and allowed to stir for 5 minutes to obtain a clear solution. This was followed by the addition of the brominated ‘clicked’ compound (1eq.,). The reaction medium was heated under reflux at 120 °C for 20-24 hrs until a solid precipitate appeared. The reaction mixture was allowed to cool to room temperature and purified by suction filtration to obtain the final product which was a white solid.


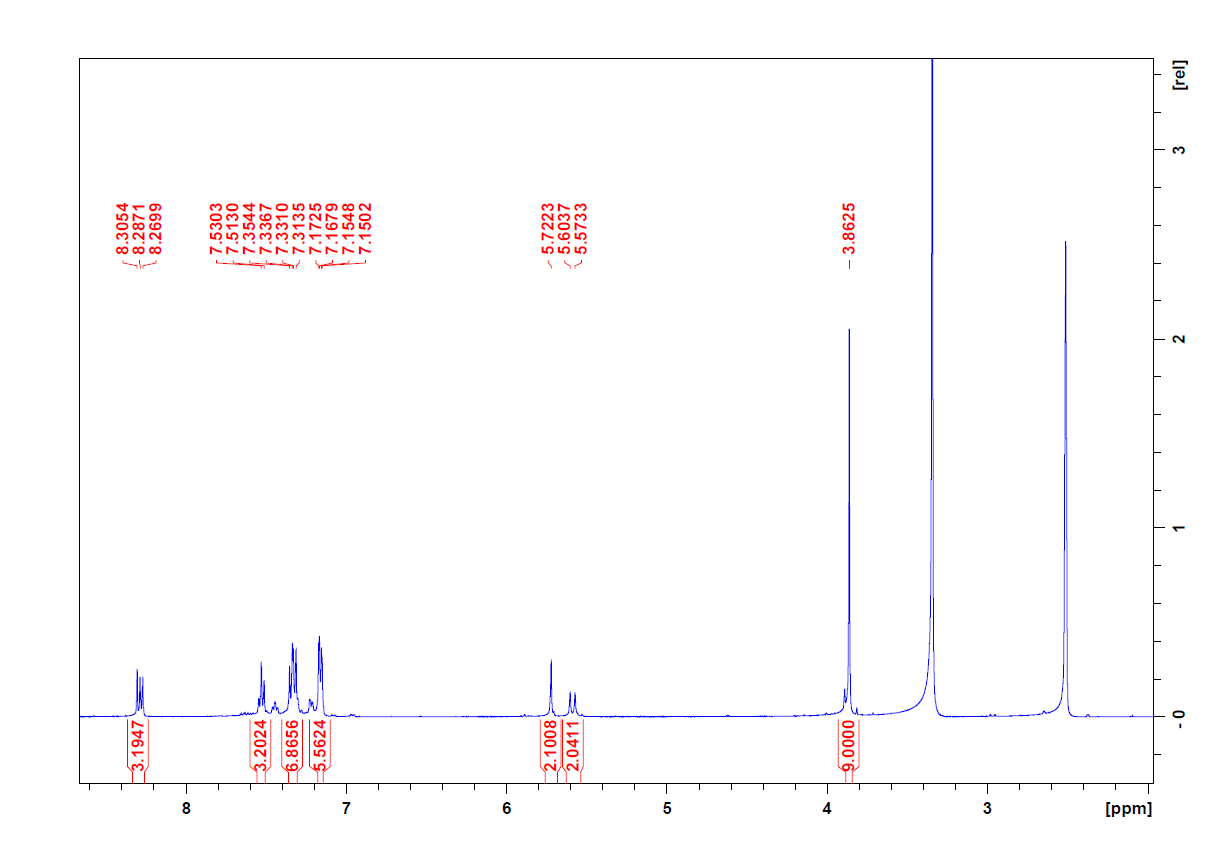


Fig SM5: 1H NMR spectrum of compound 1 (P-MEOXY)


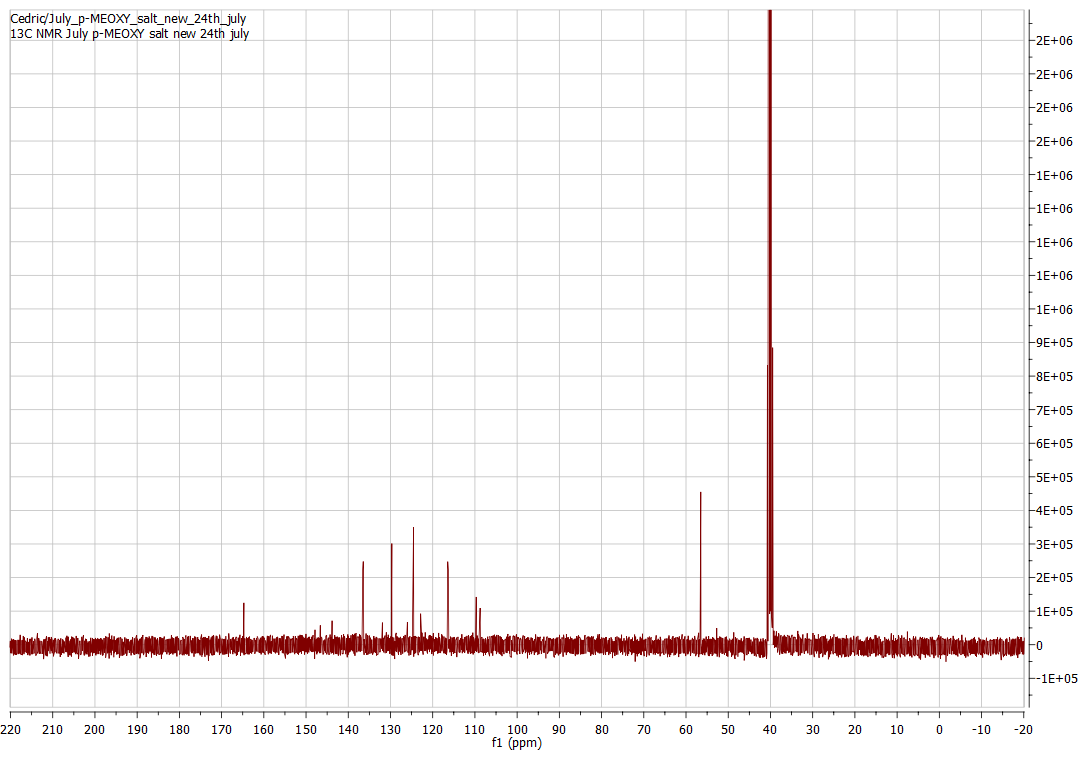


Fig SM6: 13C NMR spectrum of compound 1 (P-MEOXY)


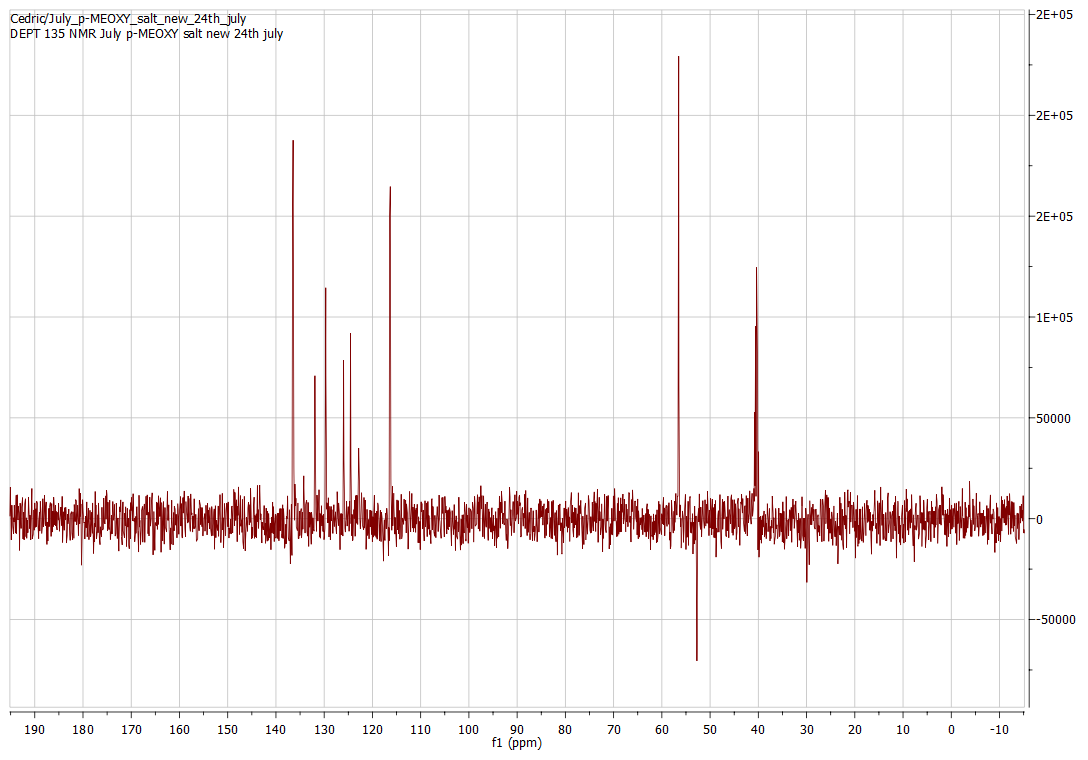


Fig SM7: DEPT-135 NMR spectrum of compound 1 (P-MEOXY)

Fig SM8: 31P NMR spectrum of compound 1 (P-MEOXY)


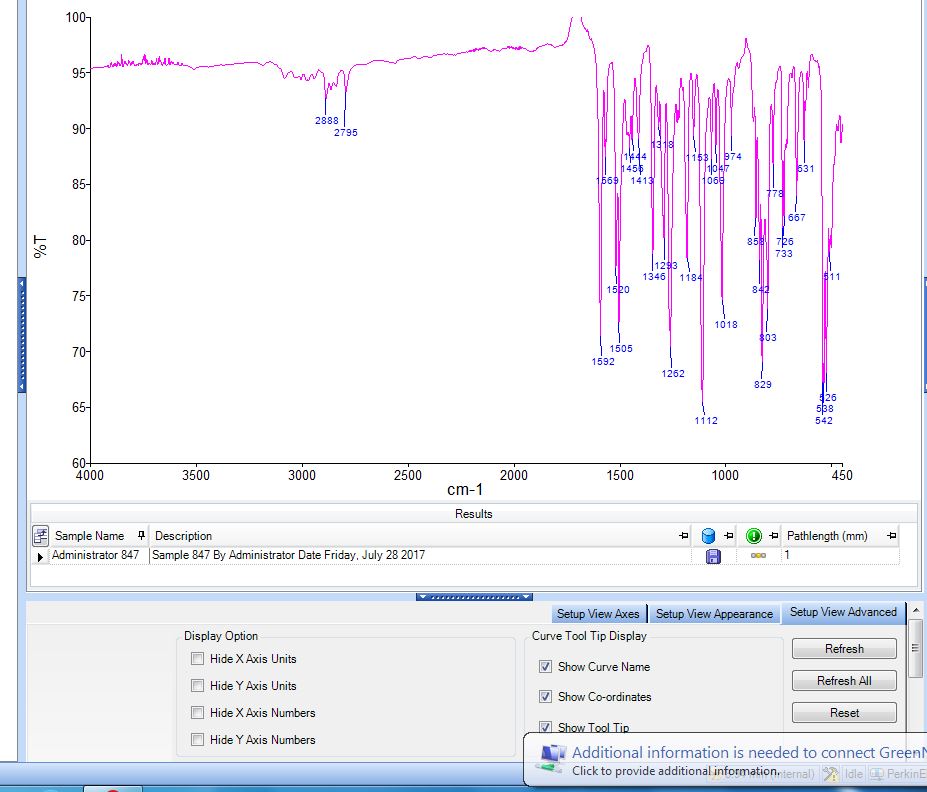


Fig SM9: FT-IR spectrum of compound 1 (P-MEOXY)


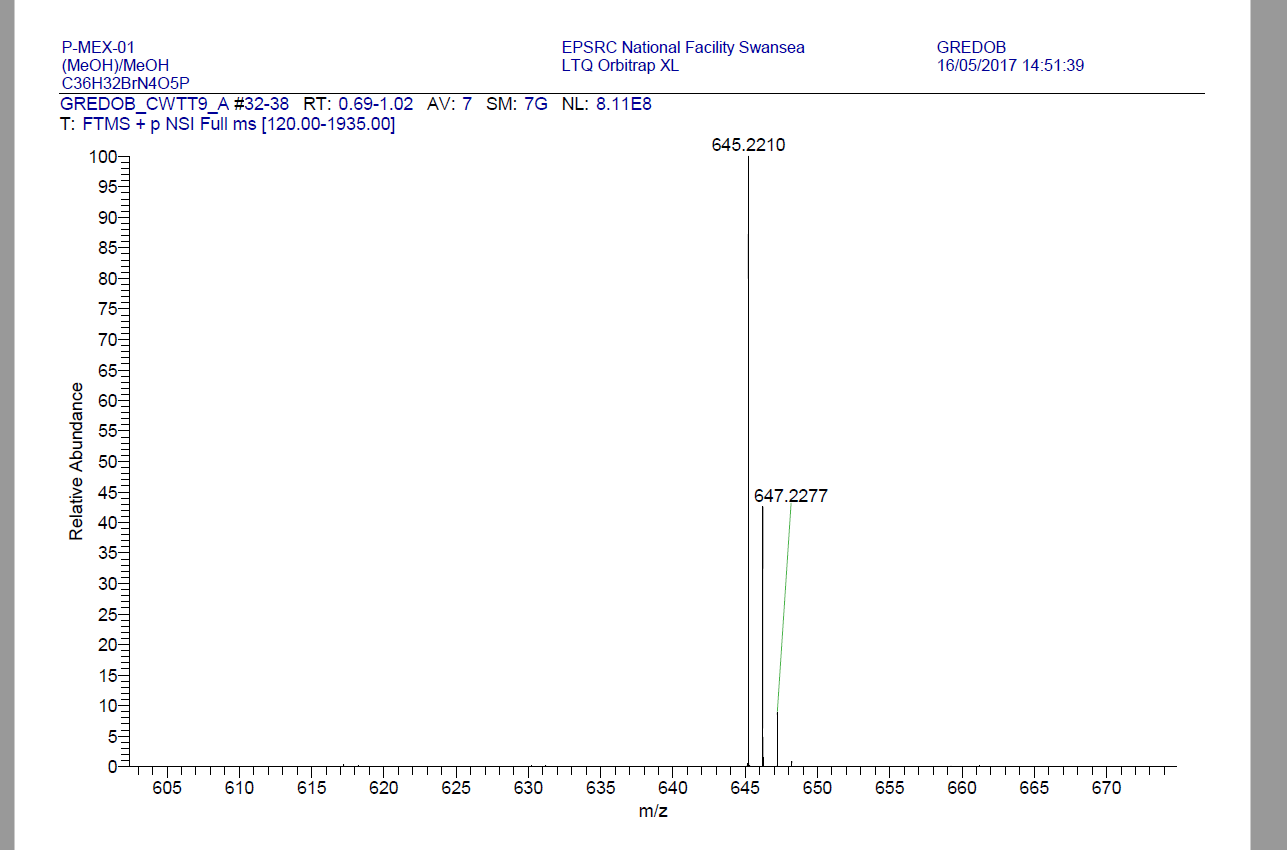


Fig SM10: HRESIMS of compound 1 (P-MEOXY)


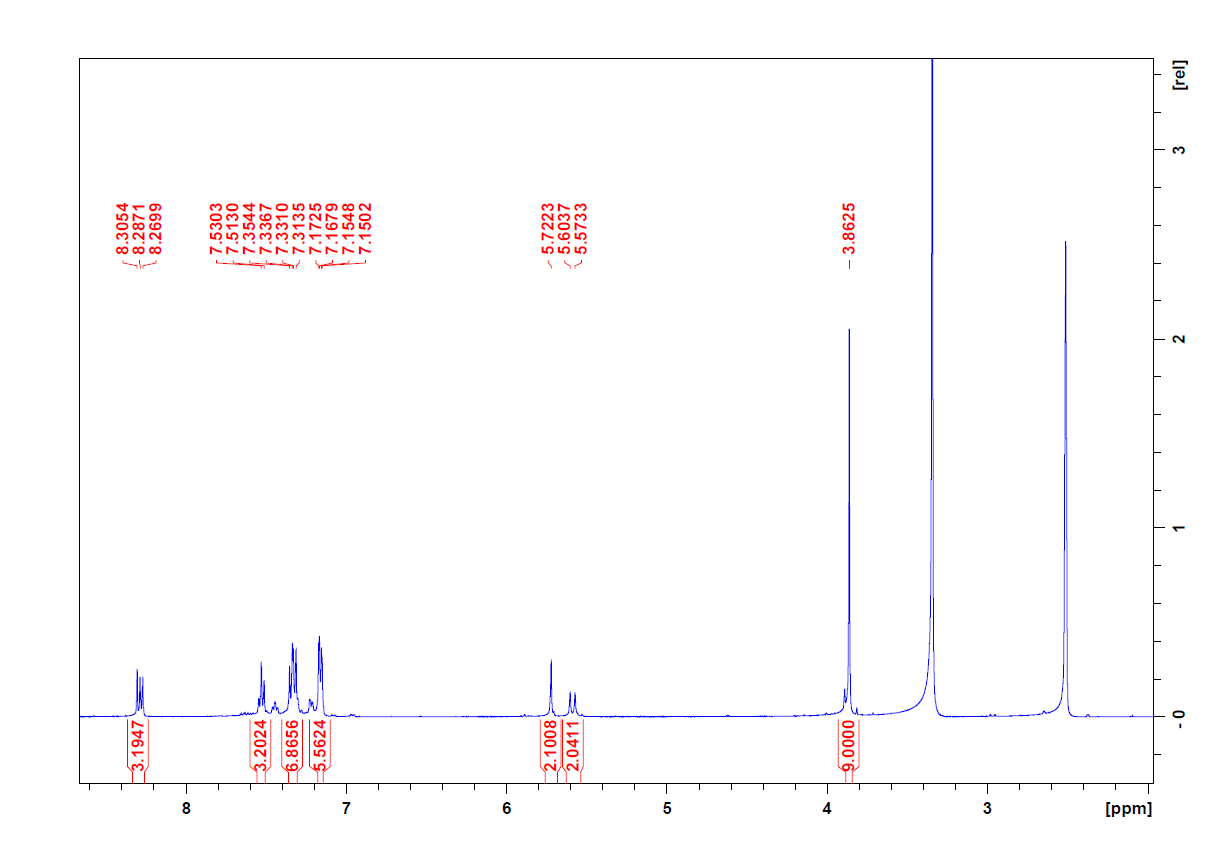


Fig SM11: 1H NMR spectrum of compound 2 (2ET-TOL)


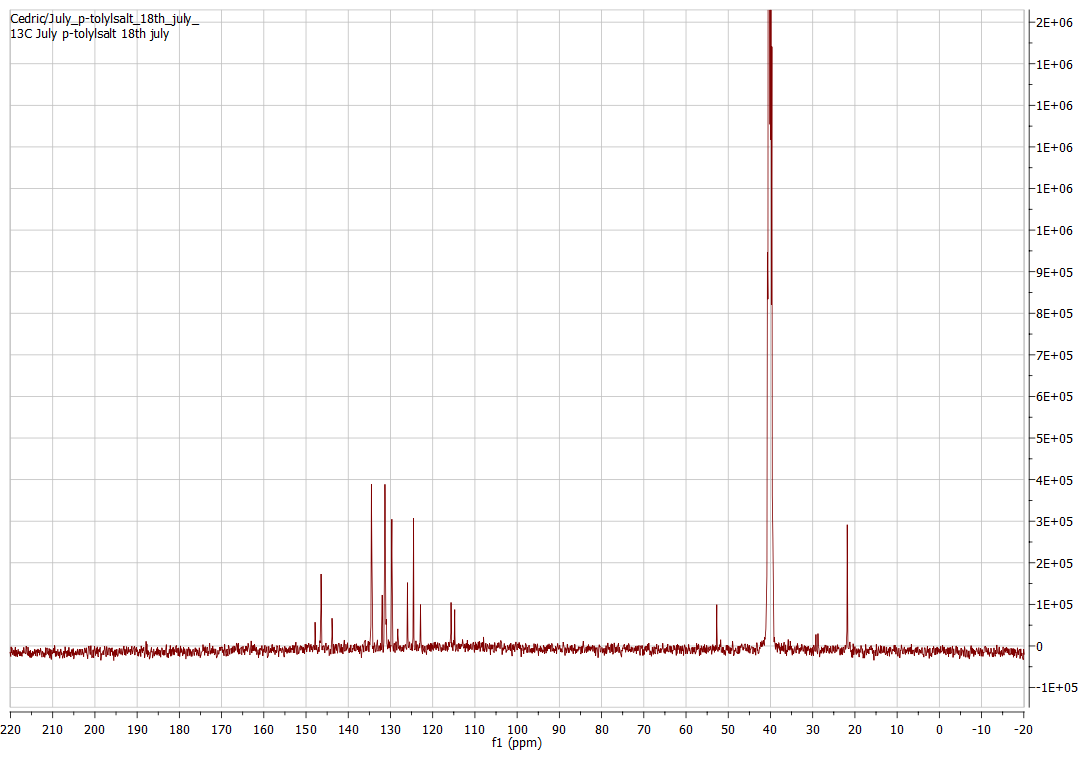


Fig SM12: 13C NMR spectrum of compound 2 (2ET-TOL)


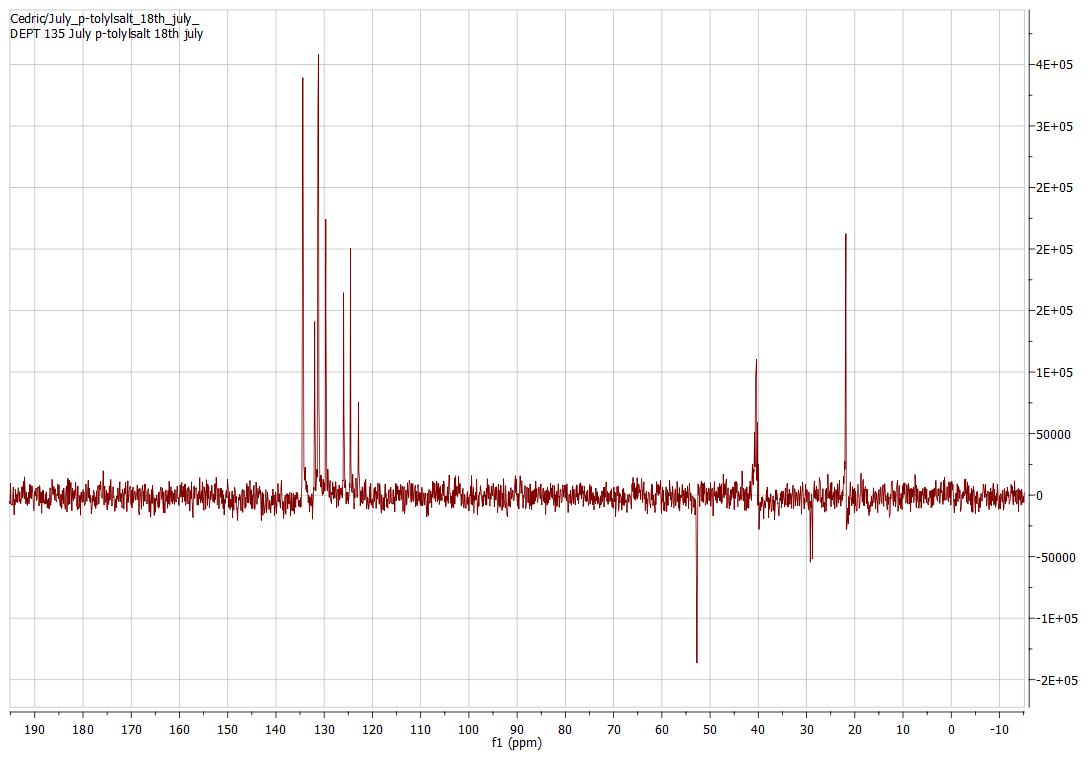


Fig SM13: DEPT-135 NMR spectrum of compound 2 (2ET-TOL)


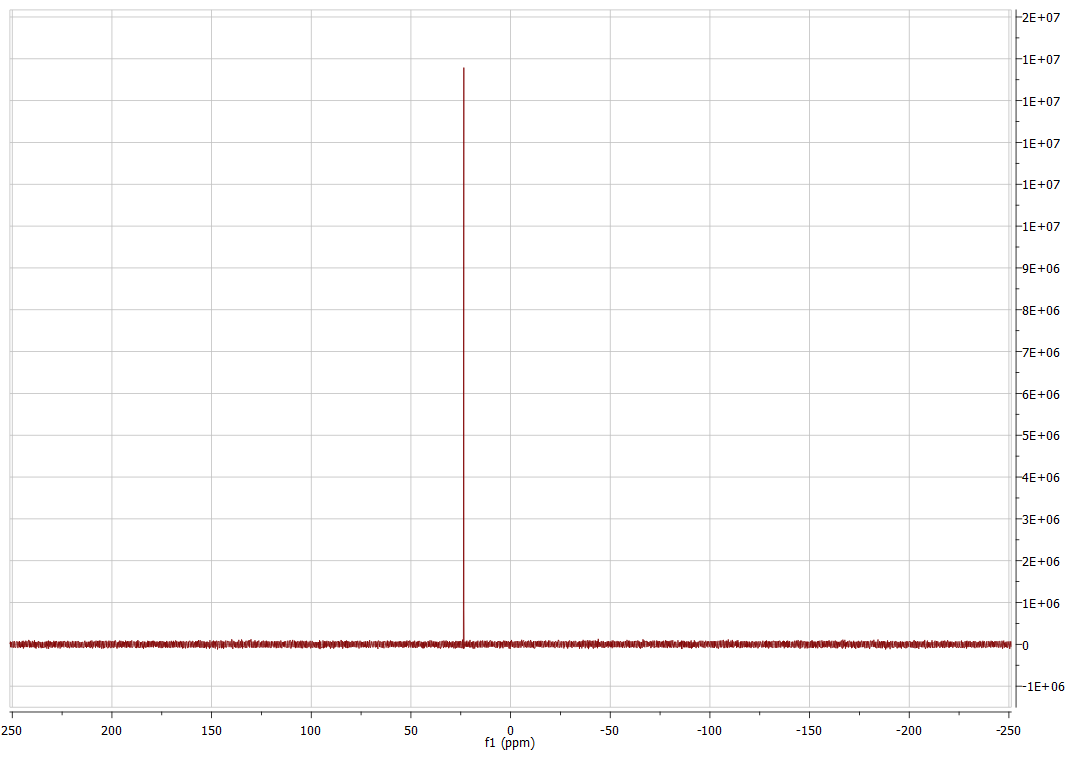


Fig SM14: 31P NMR spectrum of compound 2 (2ET-TOL)


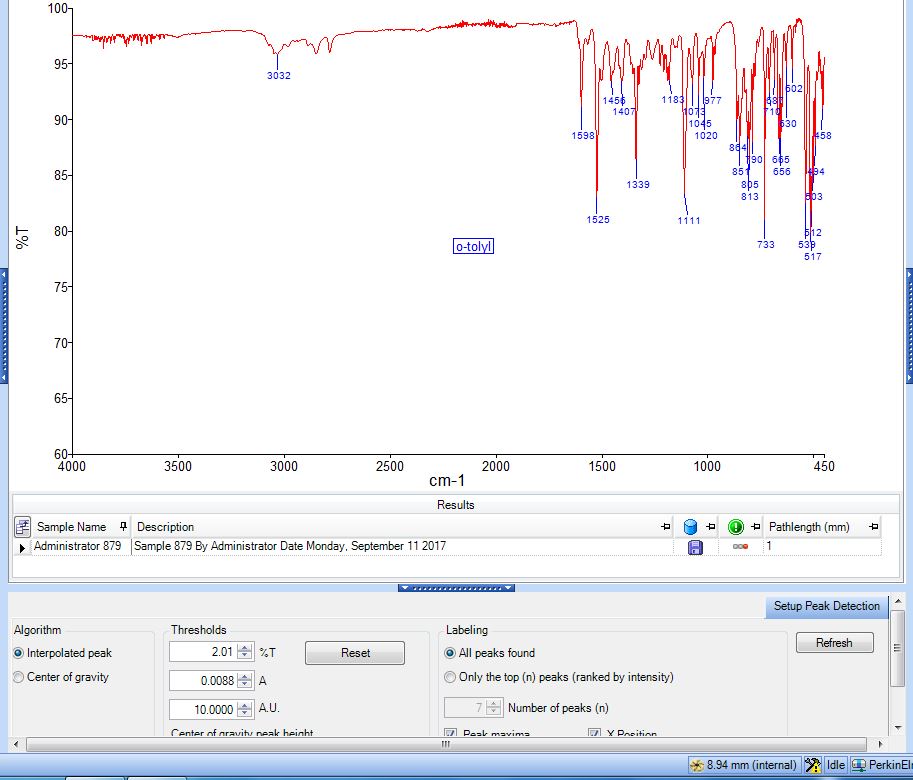


Fig SM15: FT-IR spectrum of compound 2 (2ET-TOL)


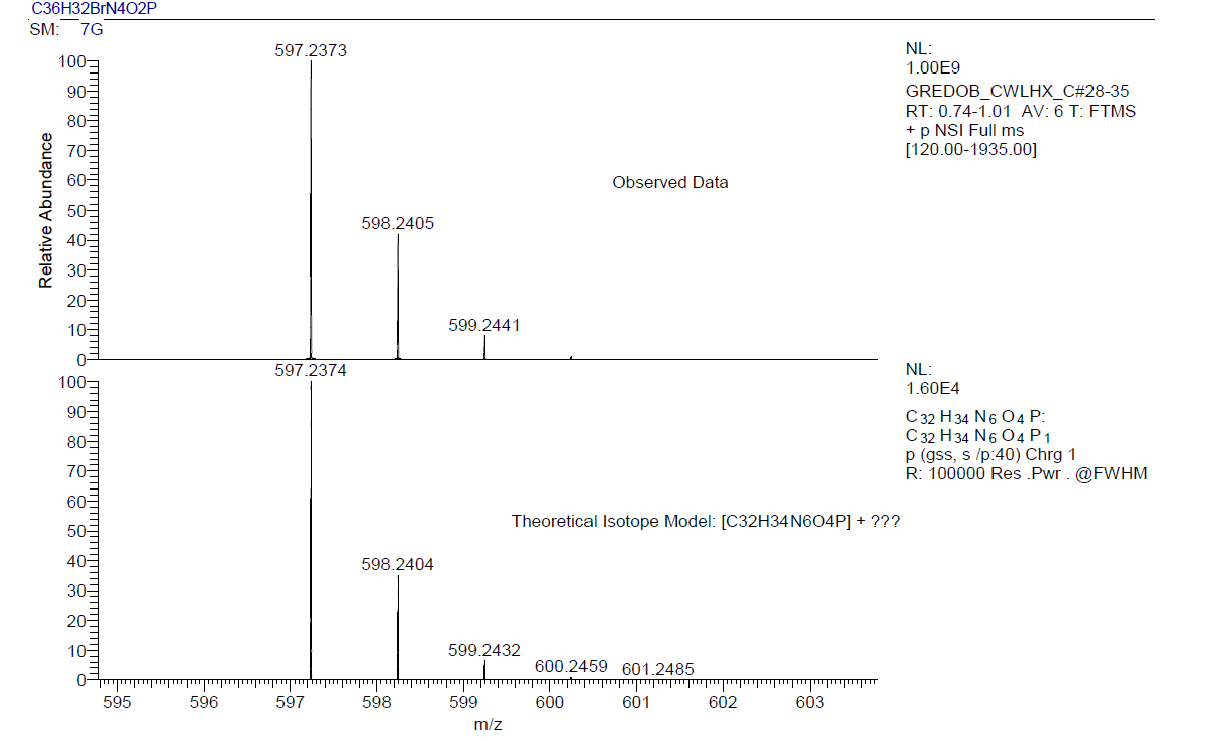


Fig SM16: HRESIMS of compound 2 (2ET-TOL)


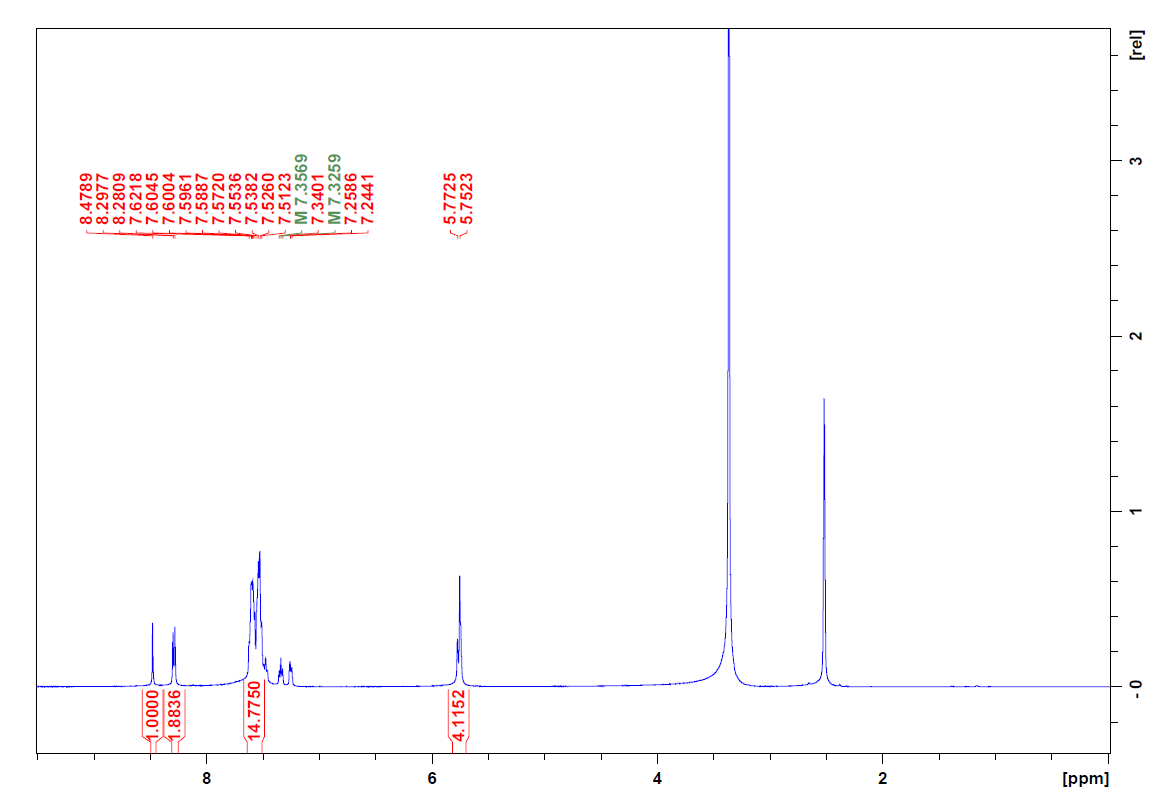


Fig SM17: 1H NMR spectrum of compound 3 (2ET-FLU).


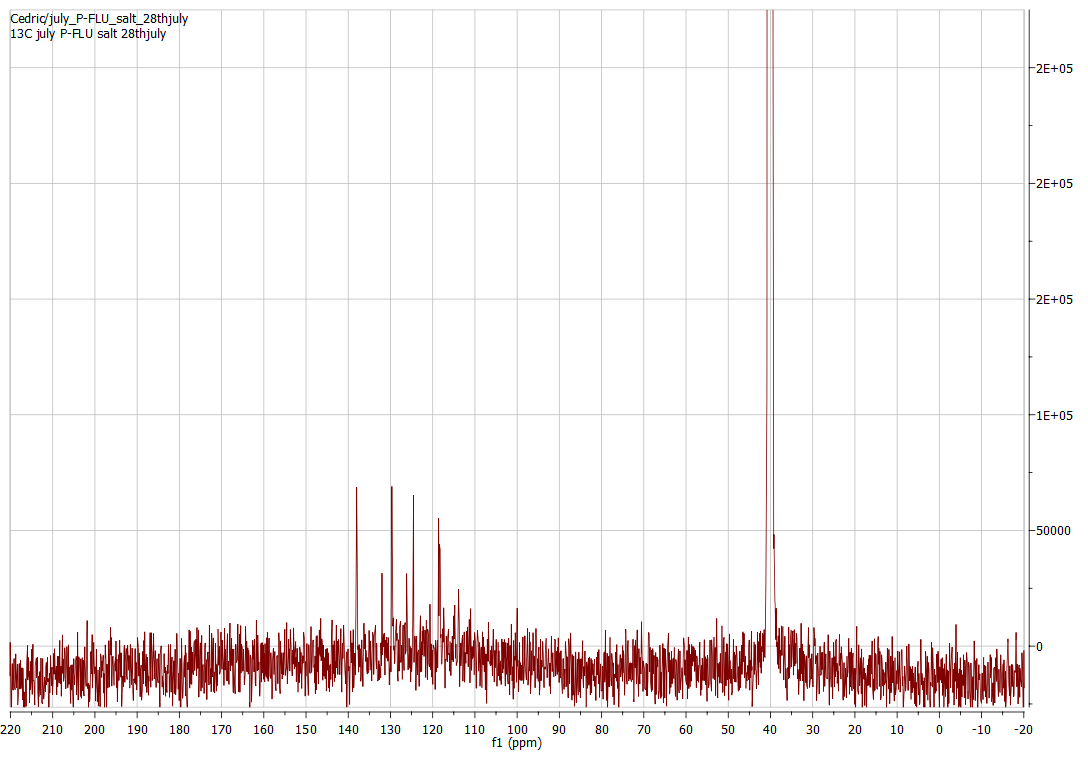


Fig SM18: 13C NMR spectrum of compound 3 (2ET-FLU)


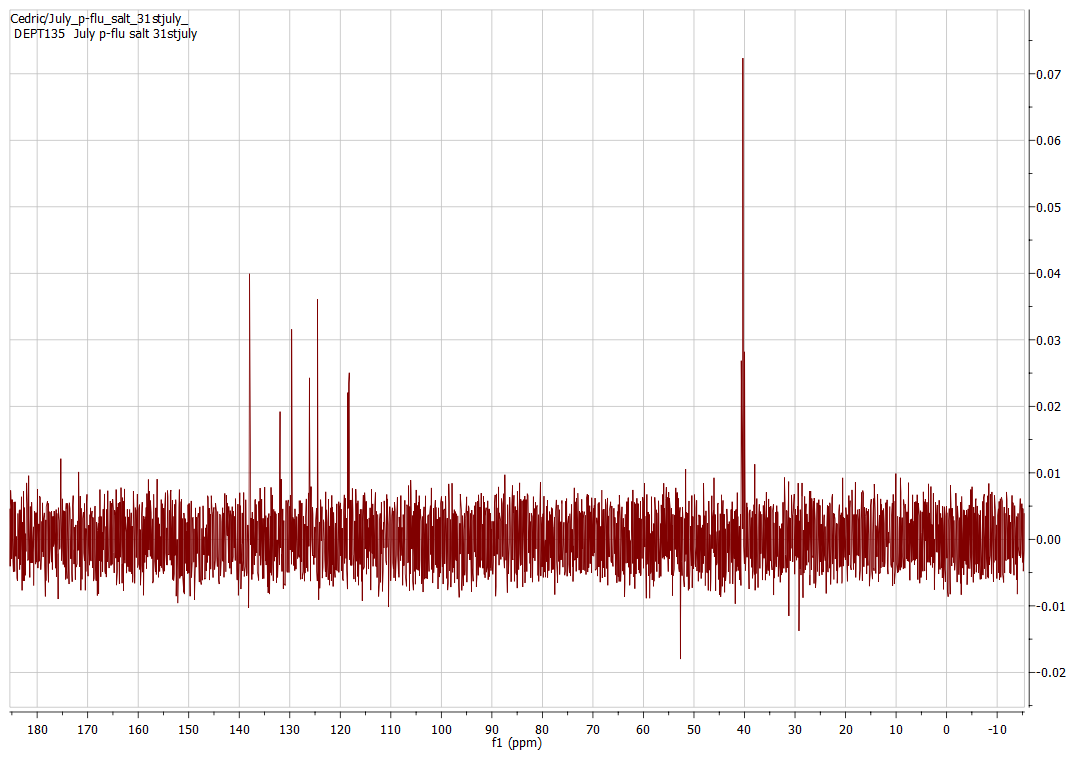


Fig SM19: DEPT-135 NMR spectrum of compound 3 (2ET-FLU)


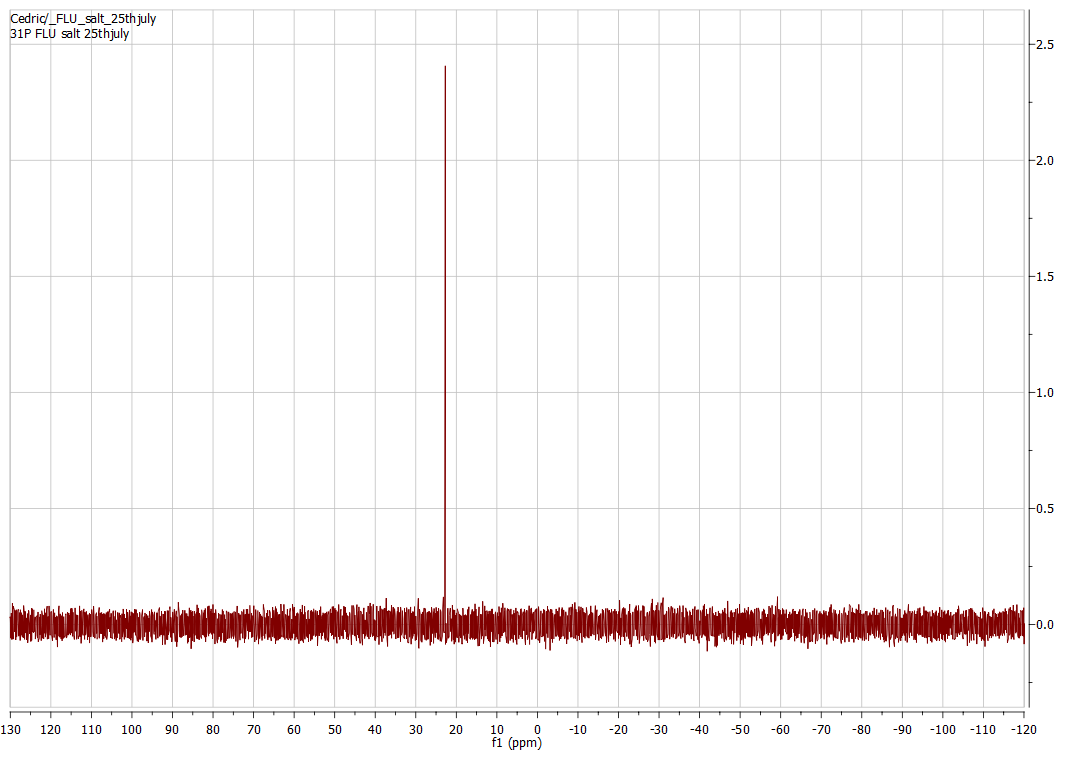


Fig SM 20: 31P spectrum of compound 3 (2ET-FLU)


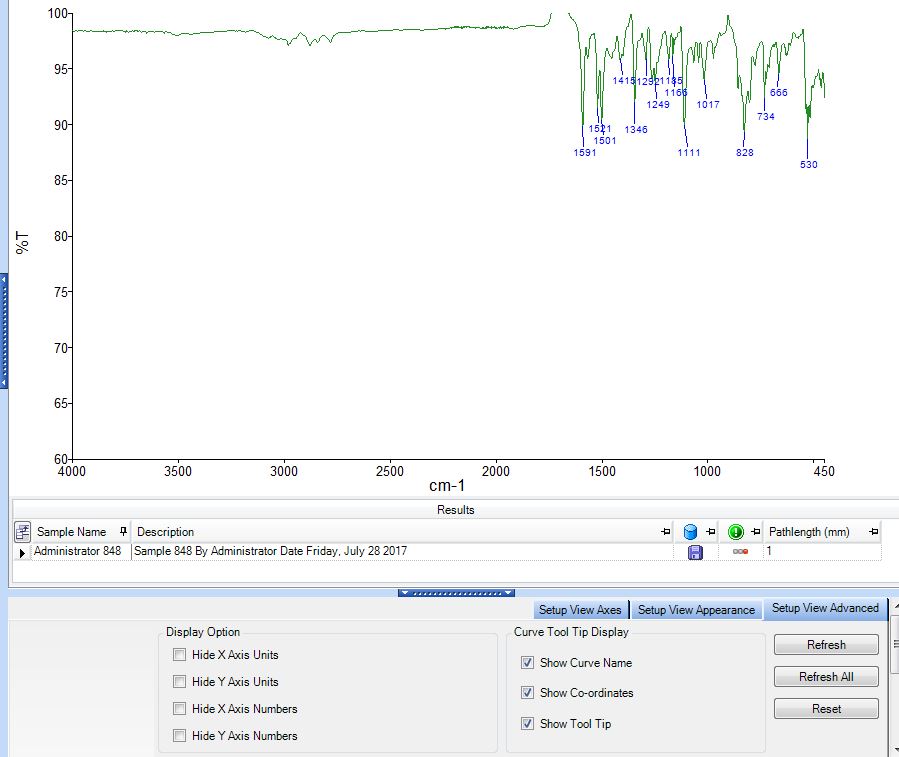


Fig SM 21: FT-IR spectrum of compound 3 (2ET-FLU)


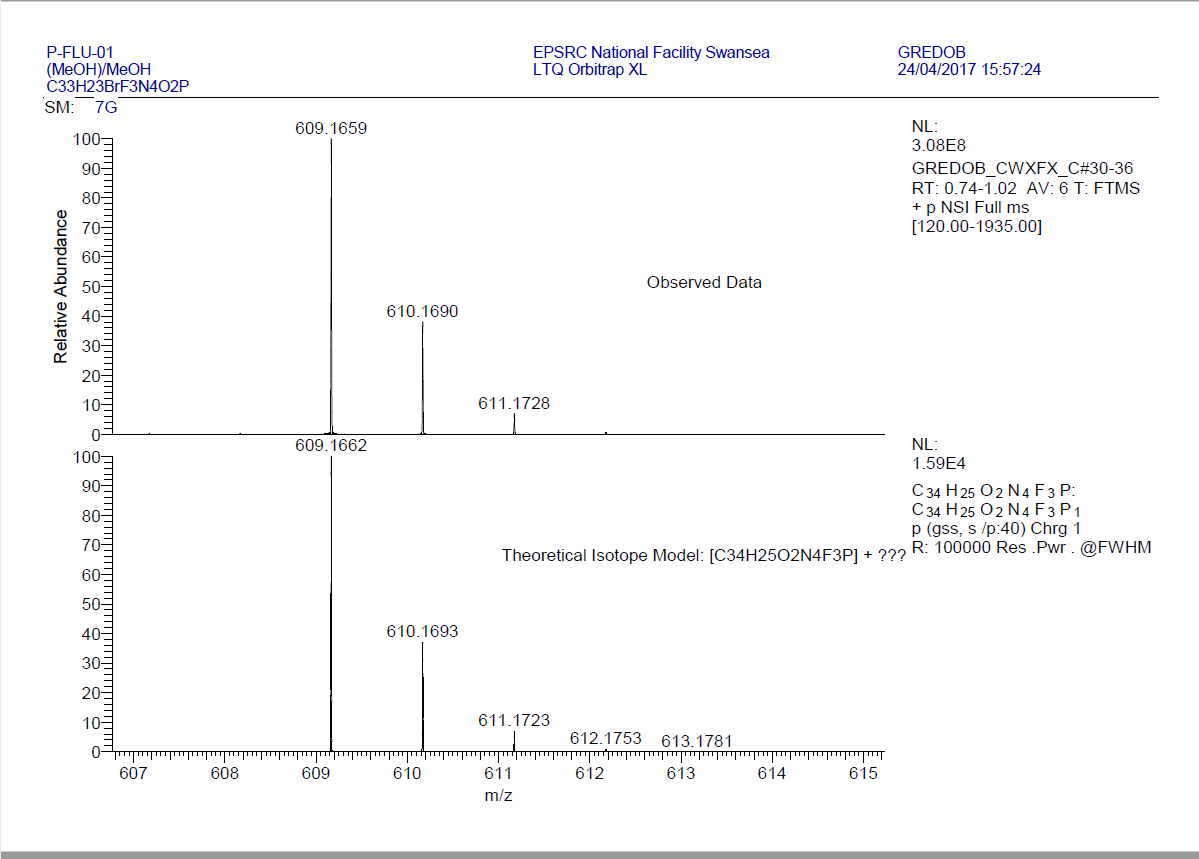


Fig SM22: HRESIMS of compound 3 (2ET-FLU)


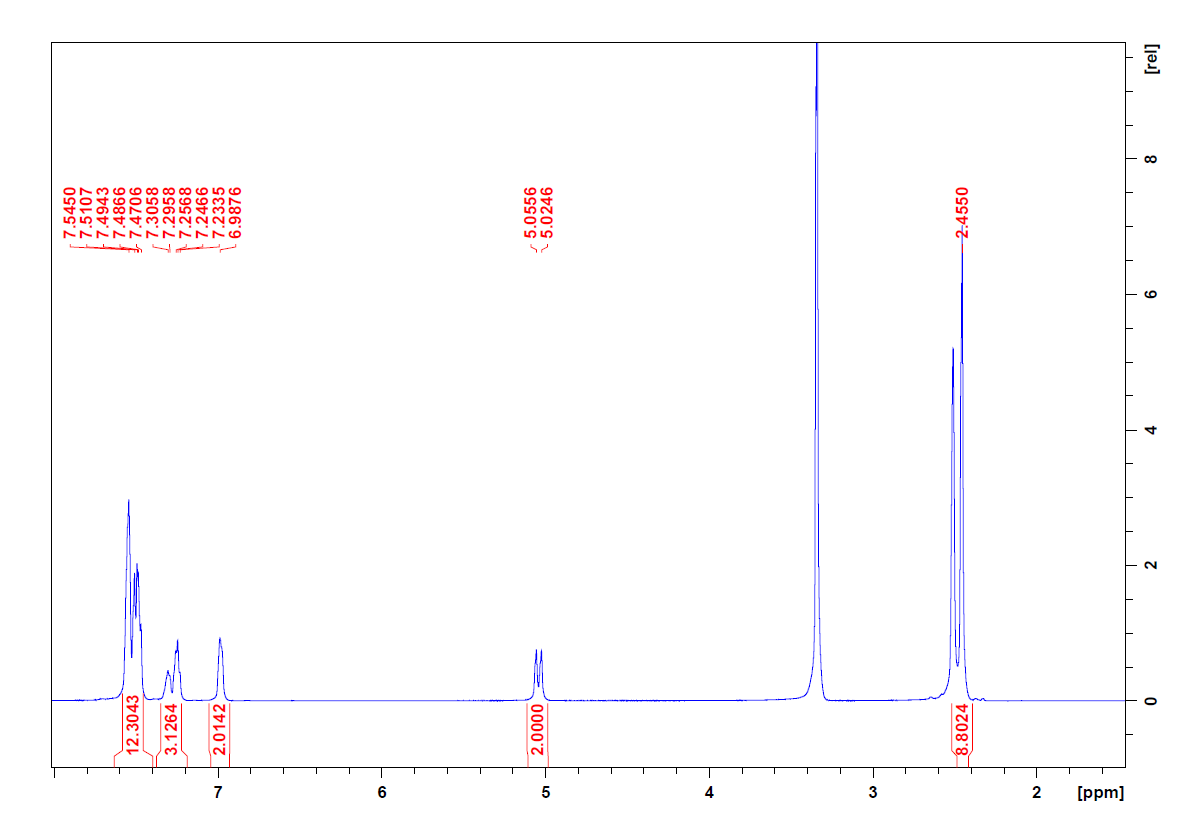


Fig SM23: 1H NMR spectrum of compound 4 (RABYL-TOL)


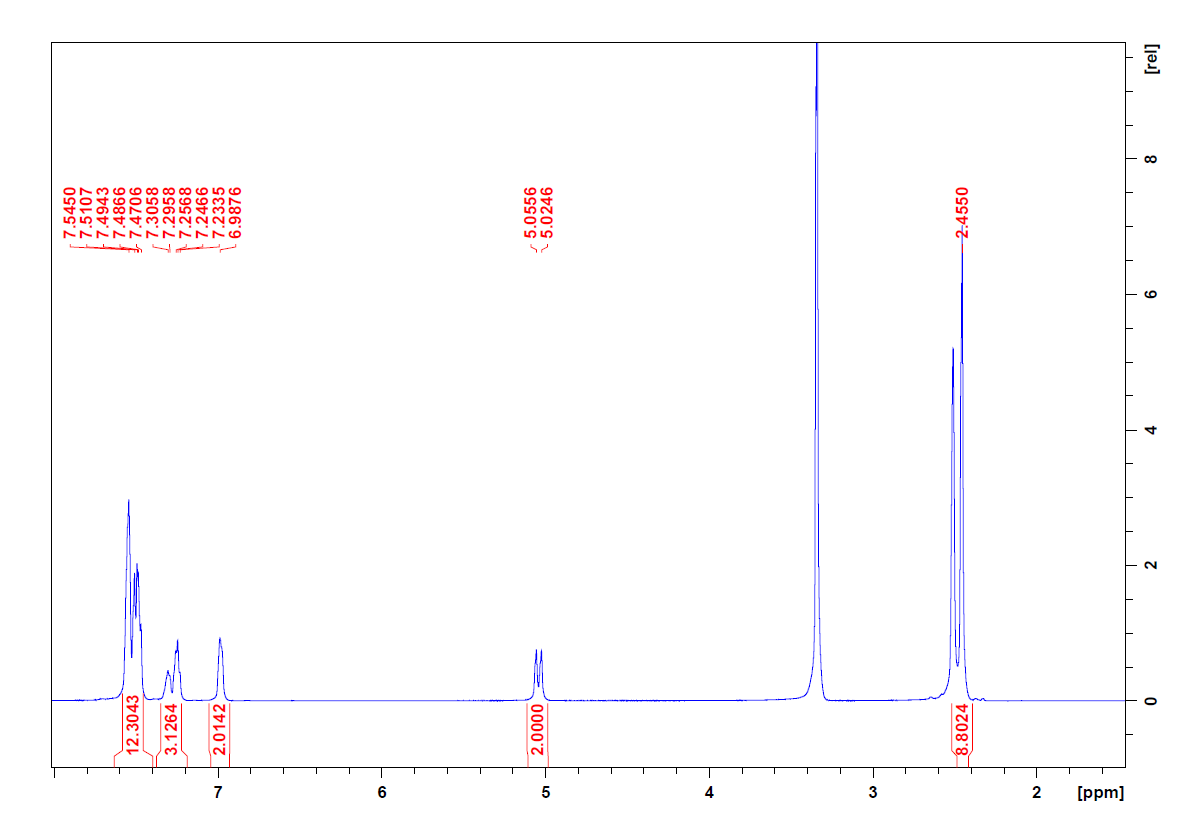
 Fig SM24: 1H NMR spectrum of compound 5 (PPh3)


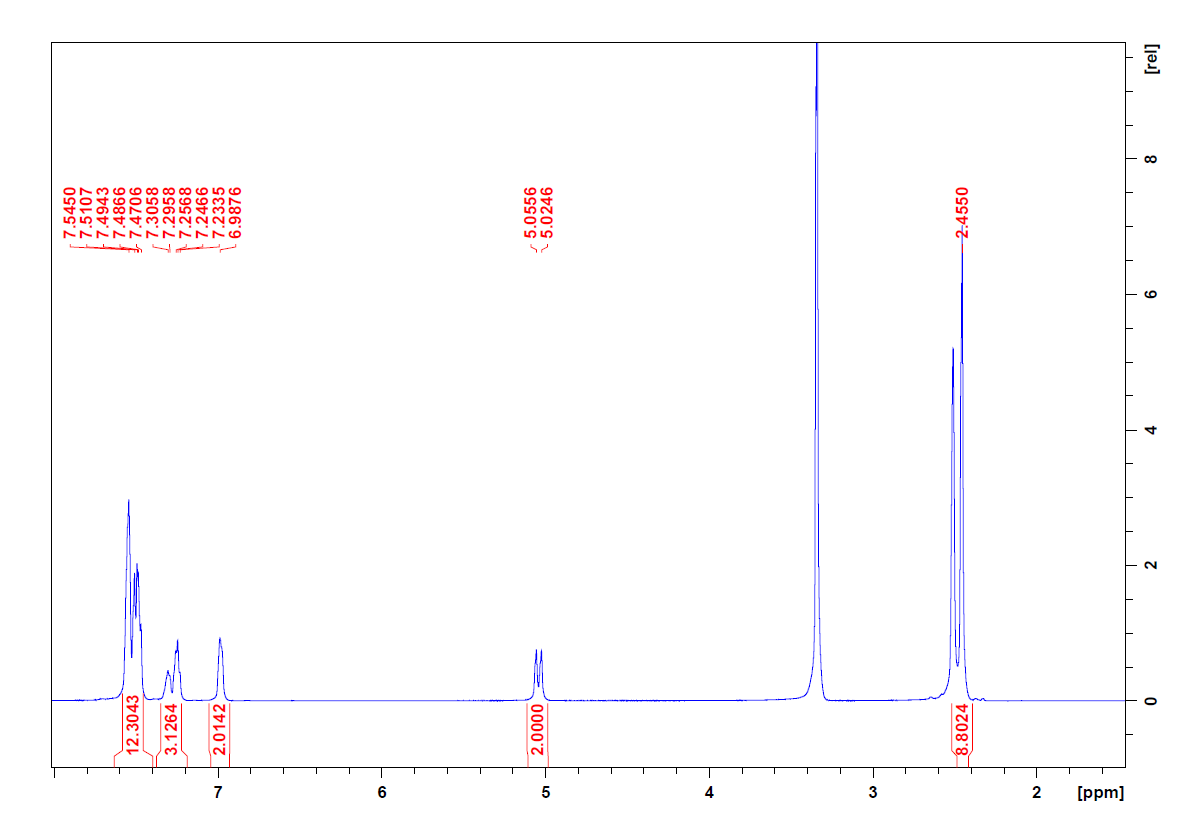


Fig SM25: 1H NMR spectrum of compound 6 (PZ)
